# Supplementary figures and images for: Ag@Au nanoprism-metal organic framework-based paper for extending the glucose sensing range in human serum and urine
Source: Royal Society of Chemistry journal article supplement (doi:10.1039/c7dt00875a), 2017-01-01

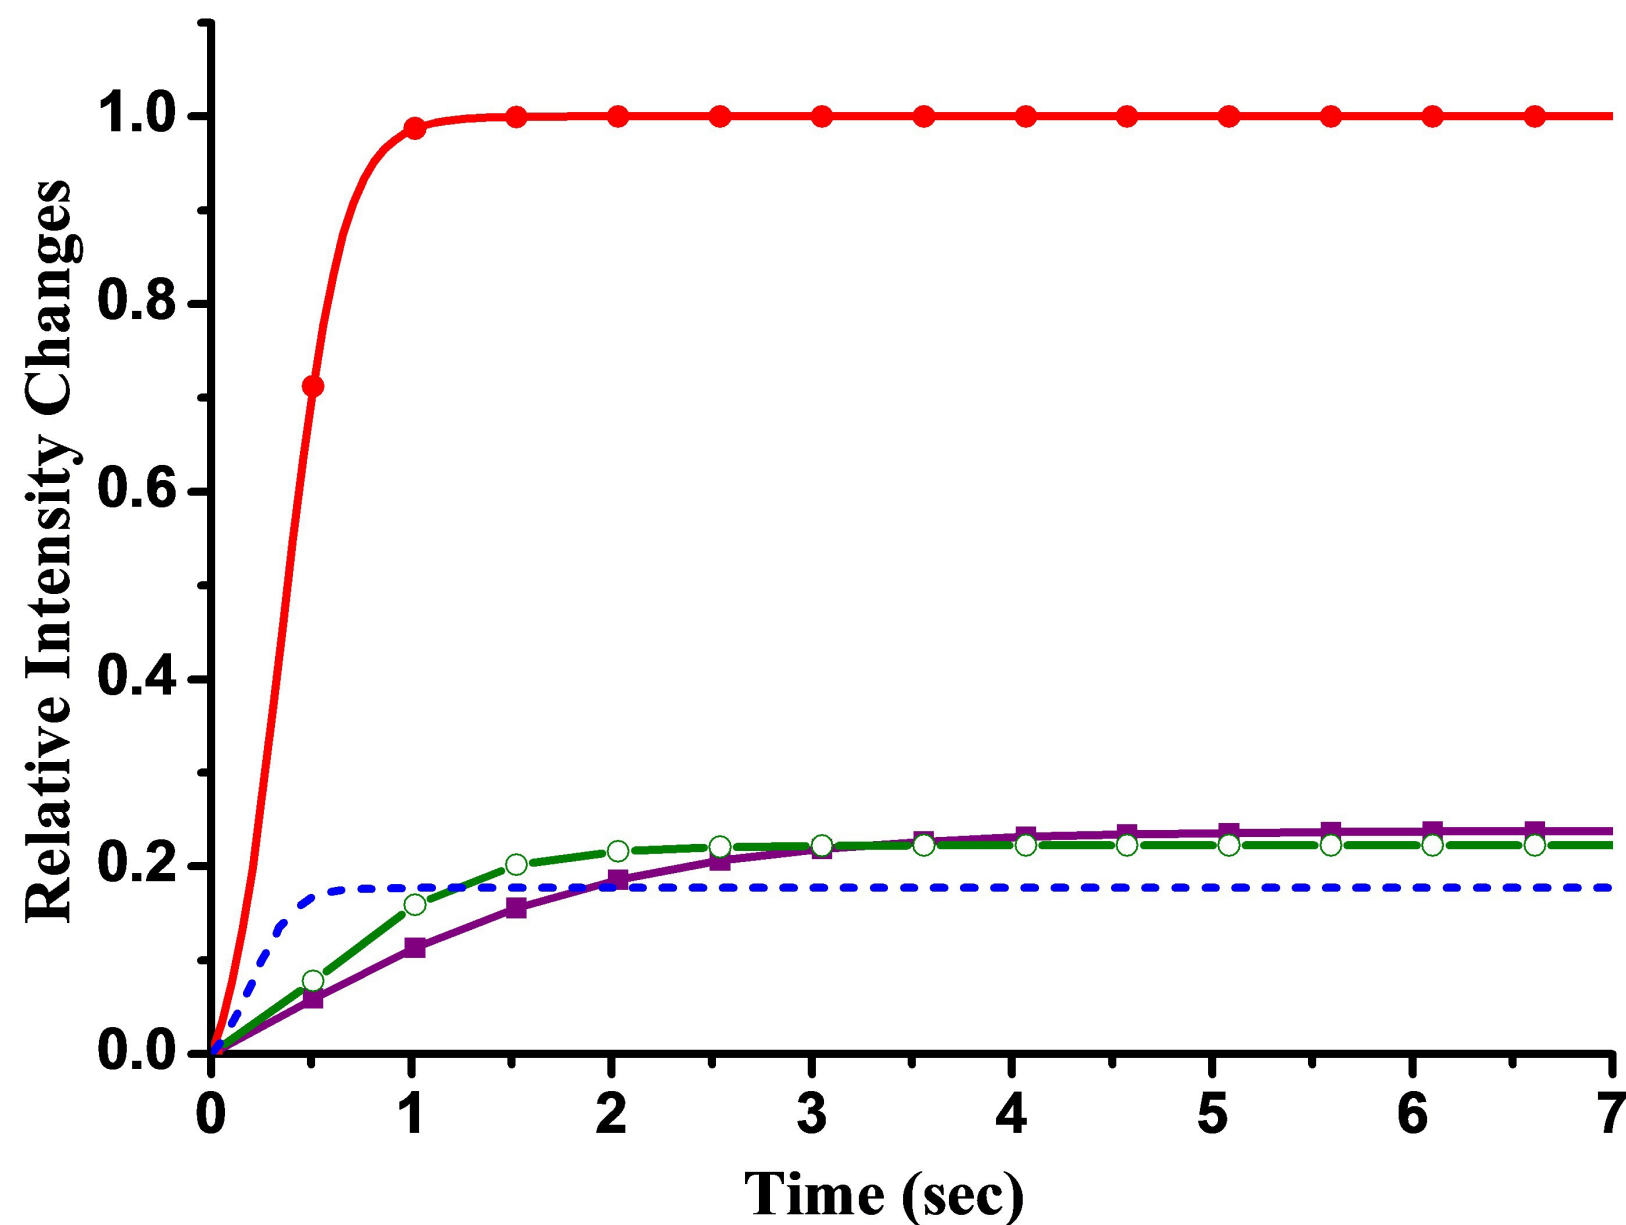

Supplement: c7dt00875a11.pdf [file c7dt00875a11.pdf]

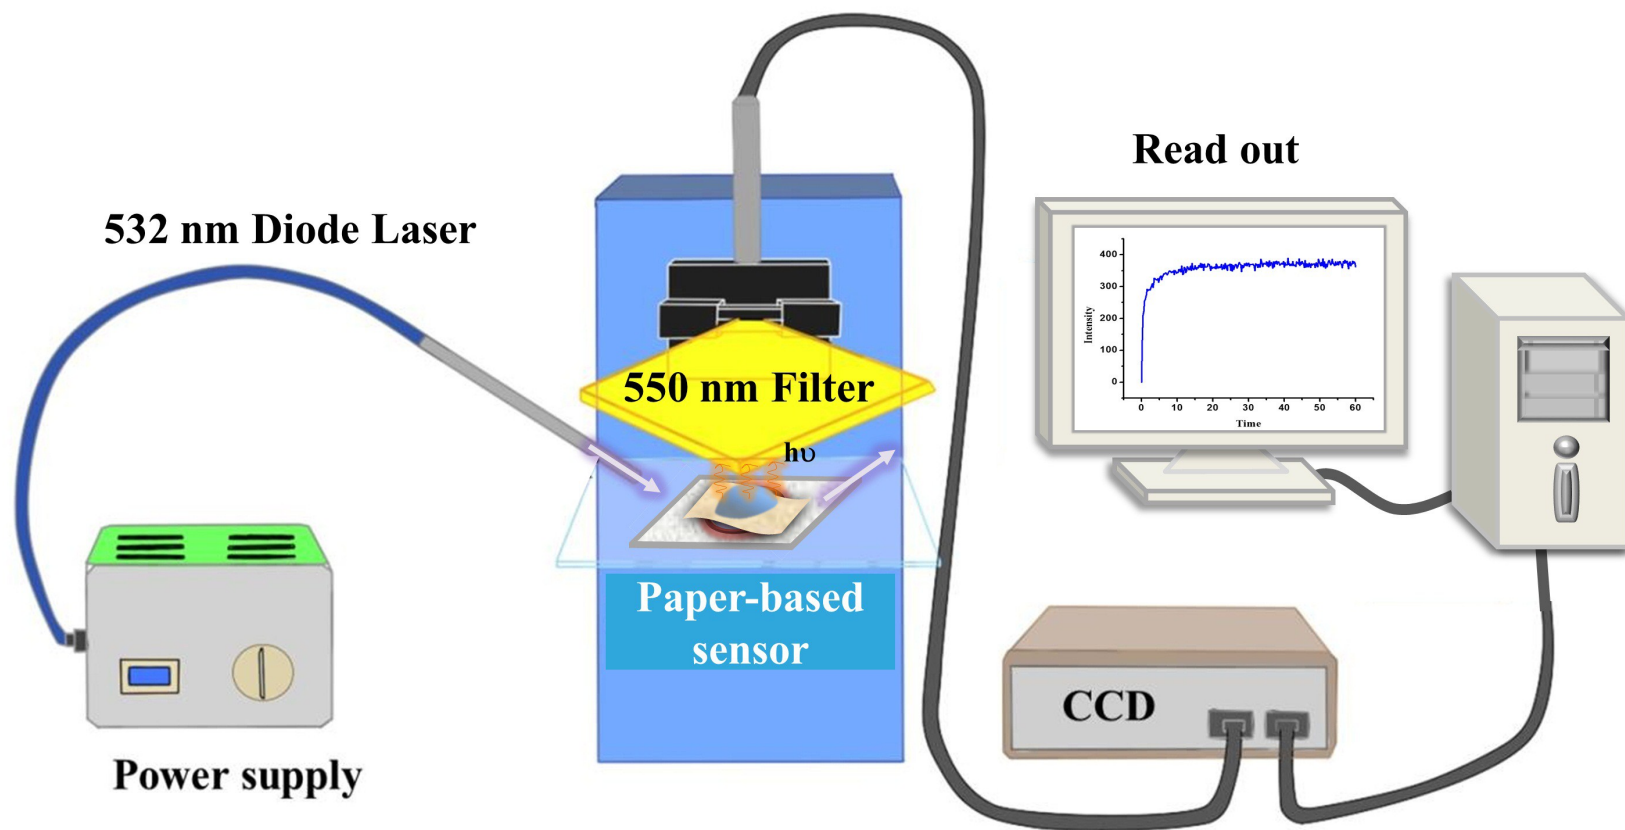

Supplement: c7dt00875a13.pdf [file c7dt00875a13.pdf]

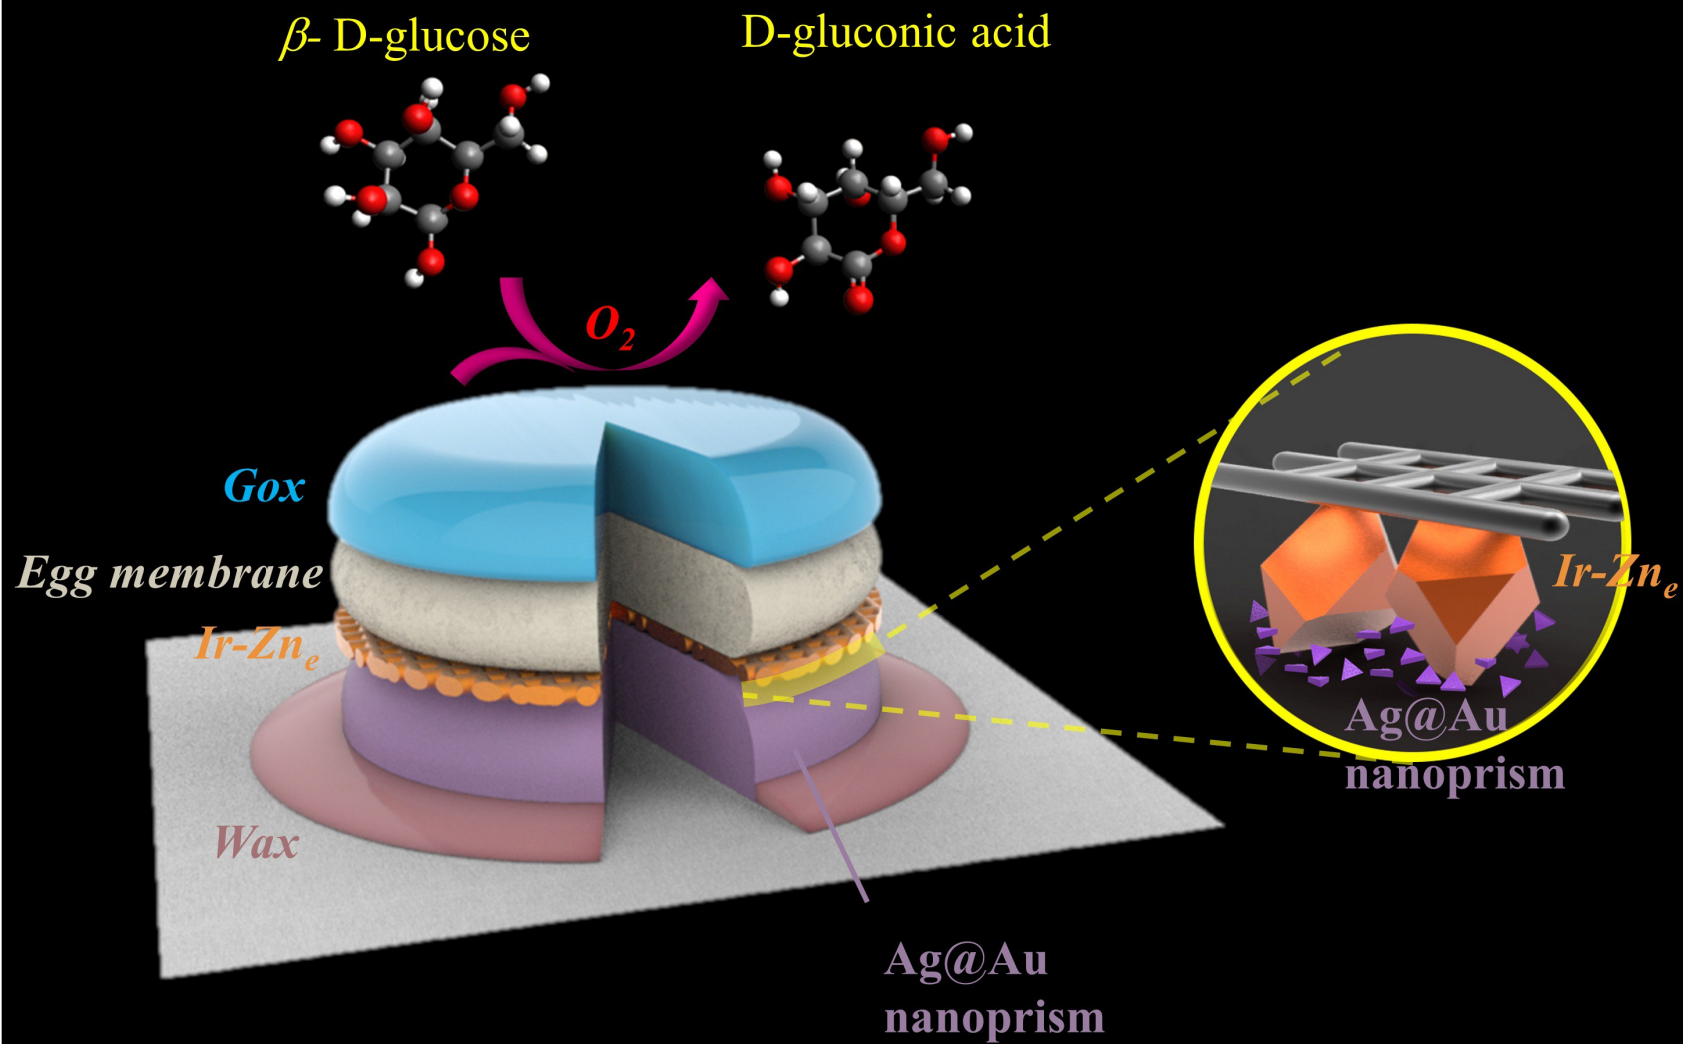

Supplement: c7dt00875a14.pdf [file c7dt00875a14.pdf]

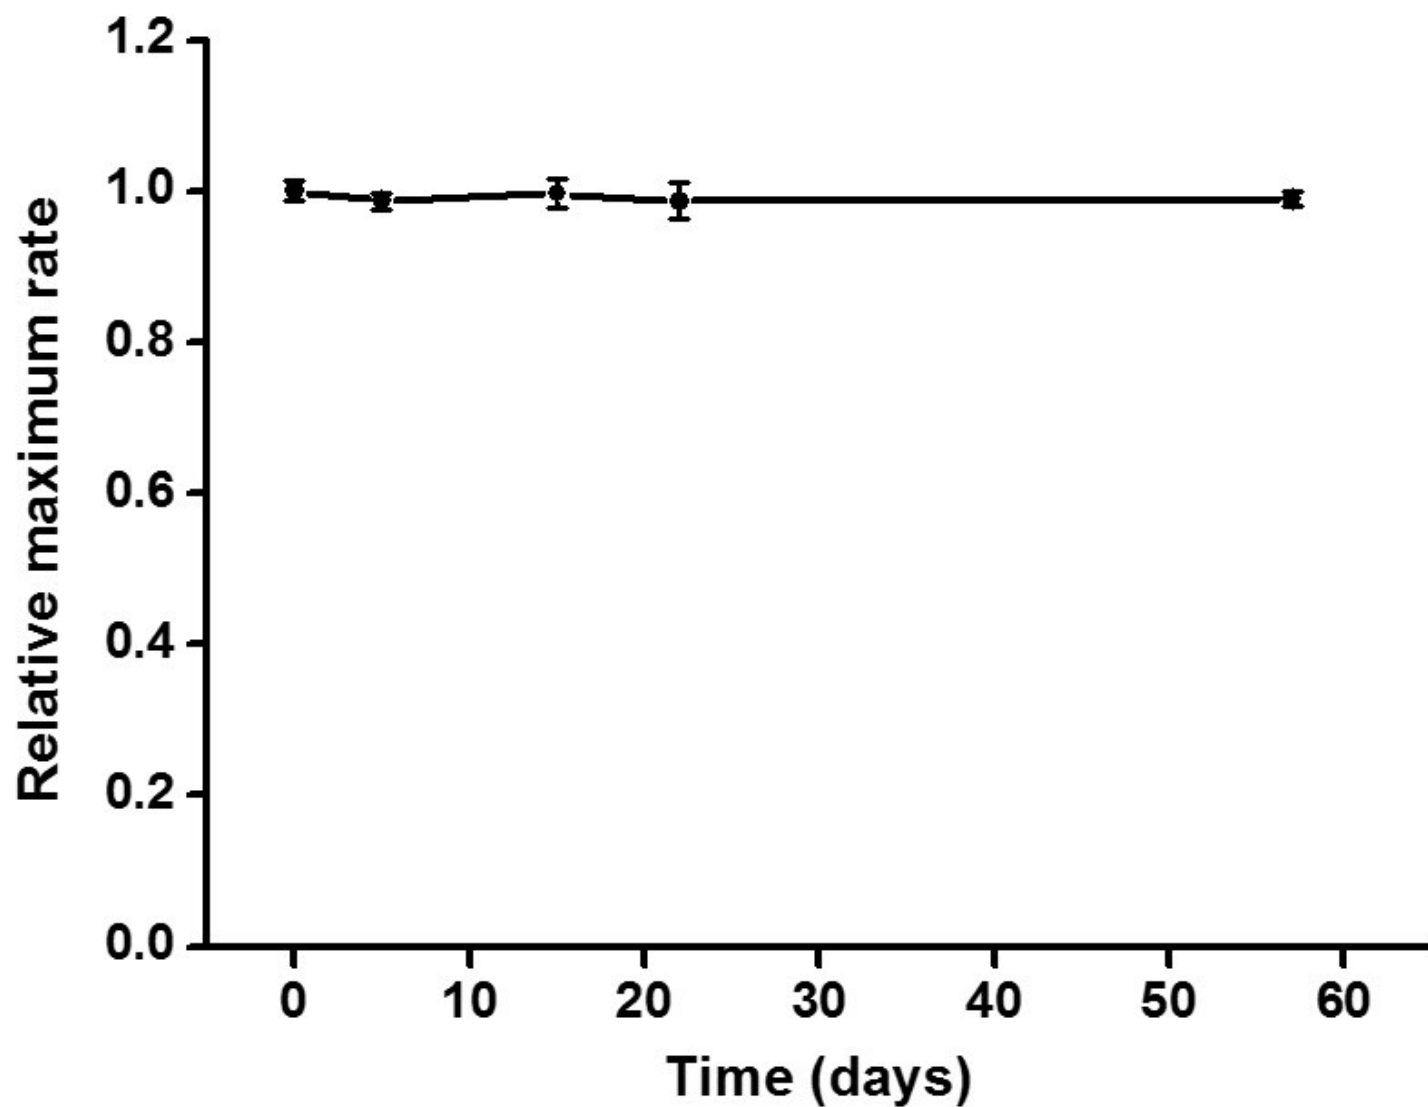

Supplement: c7dt00875a3.pdf [file c7dt00875a3.pdf]

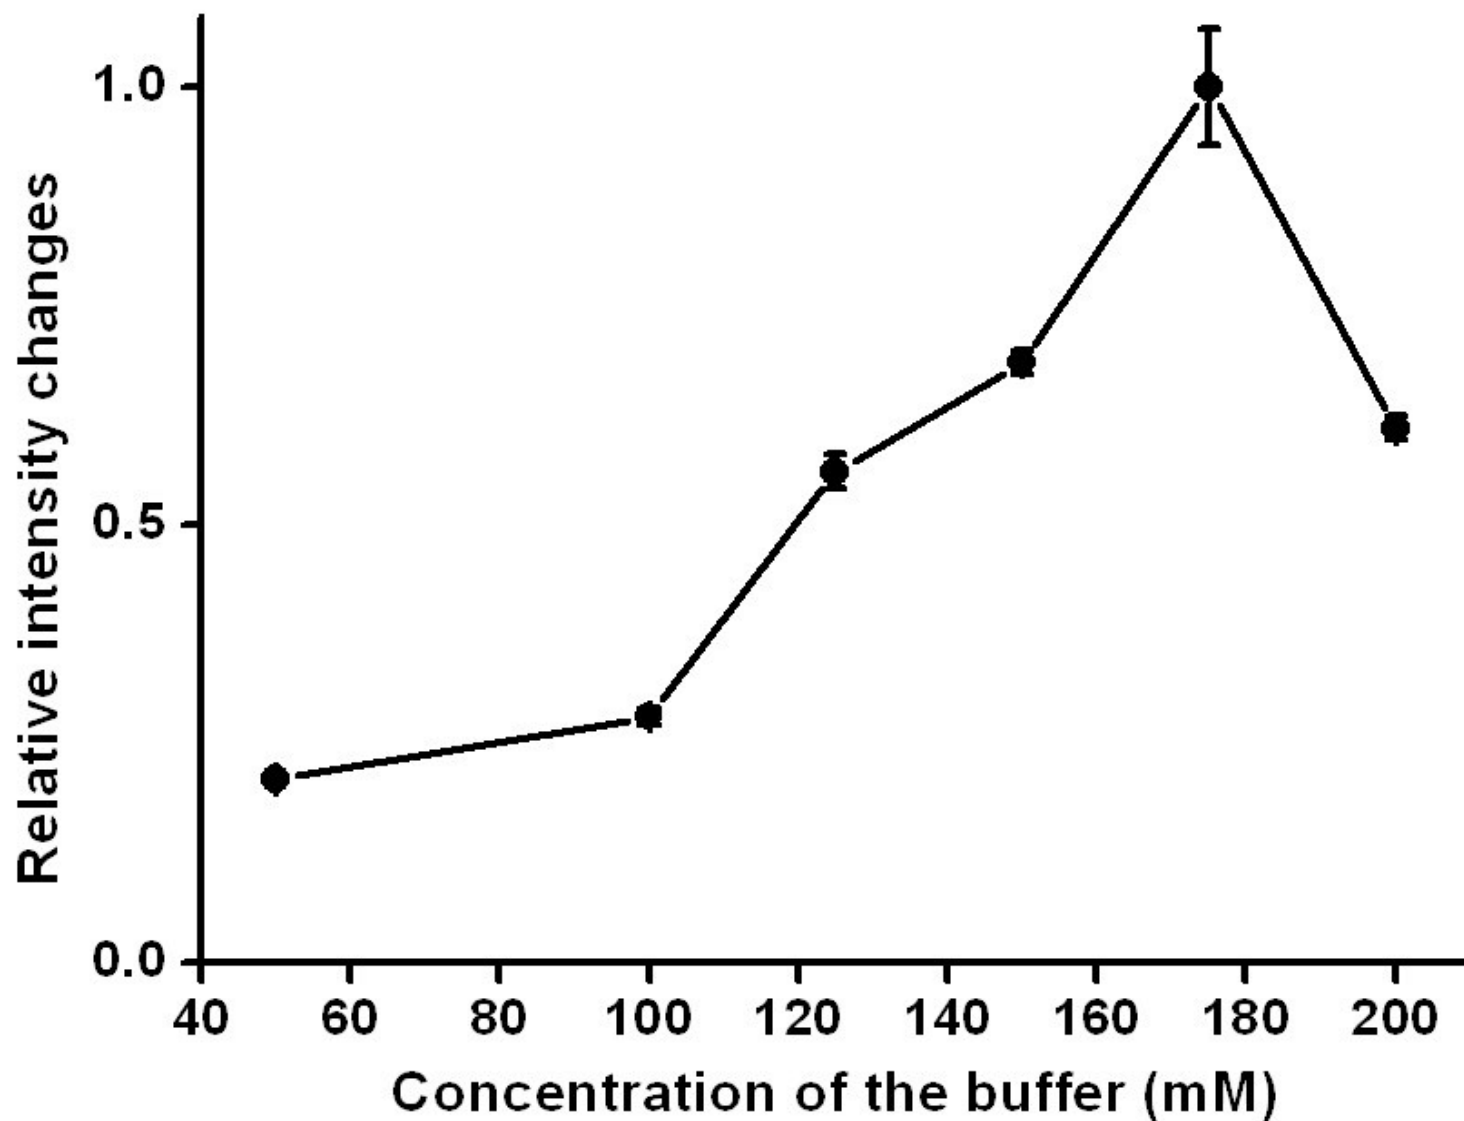

Supplement: c7dt00875a7.pdf [file c7dt00875a7.pdf]

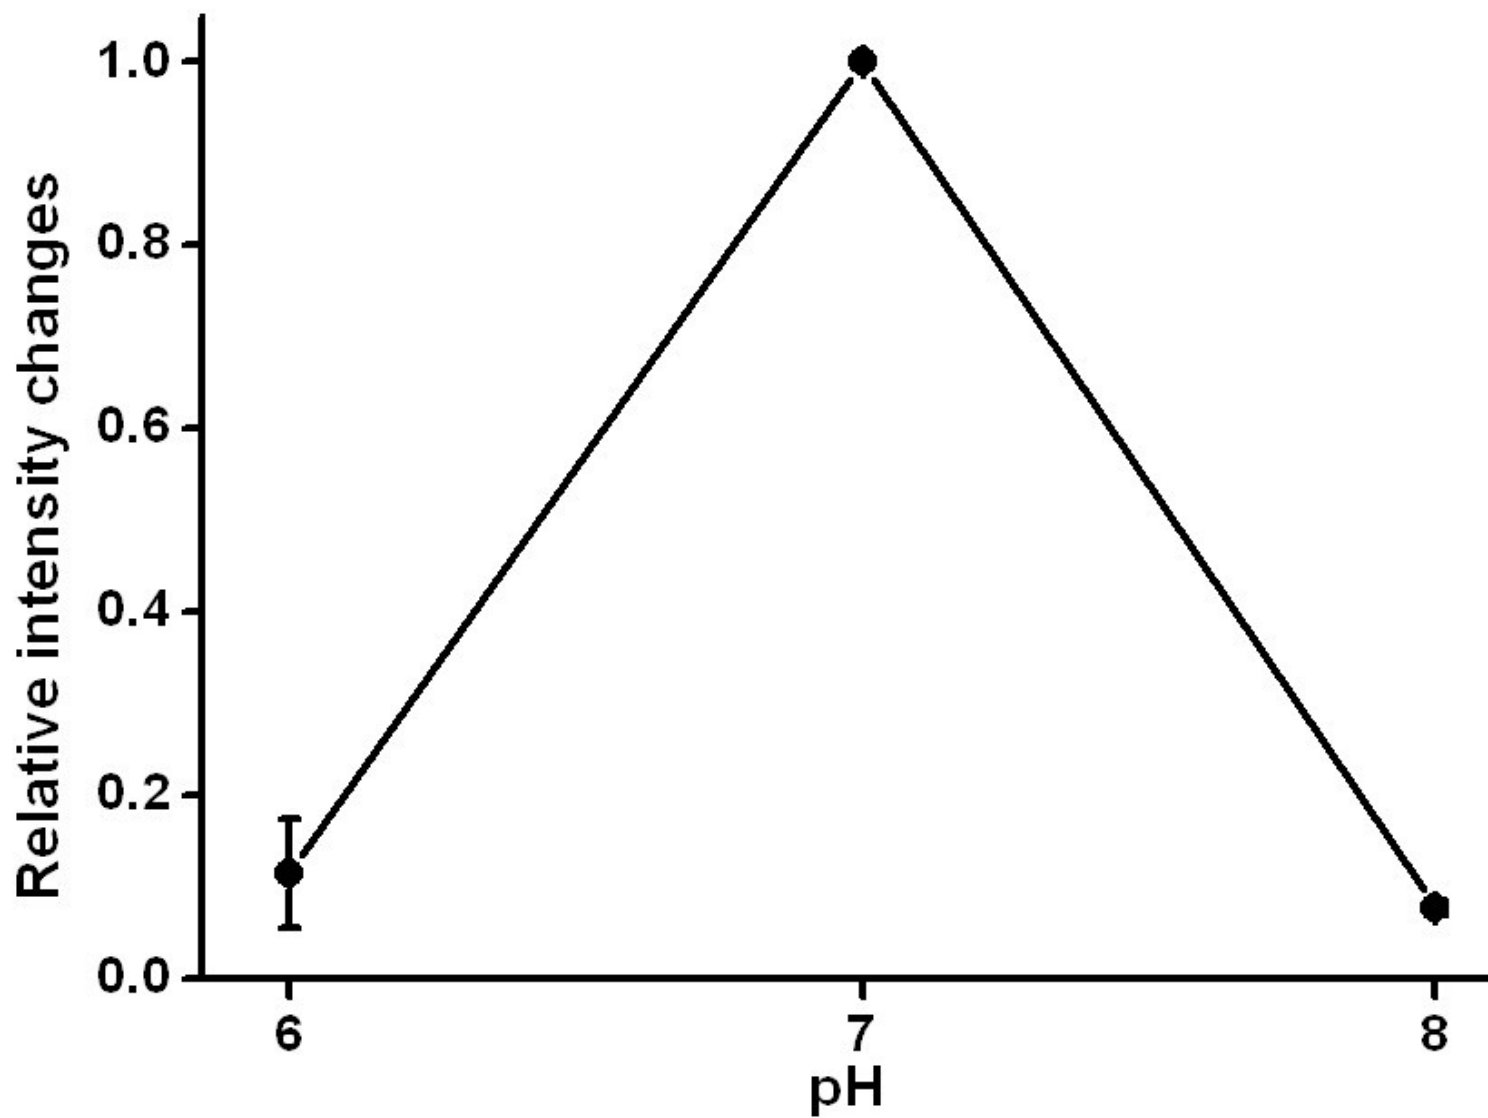

Supplement: c7dt00875a8.pdf [file c7dt00875a8.pdf]

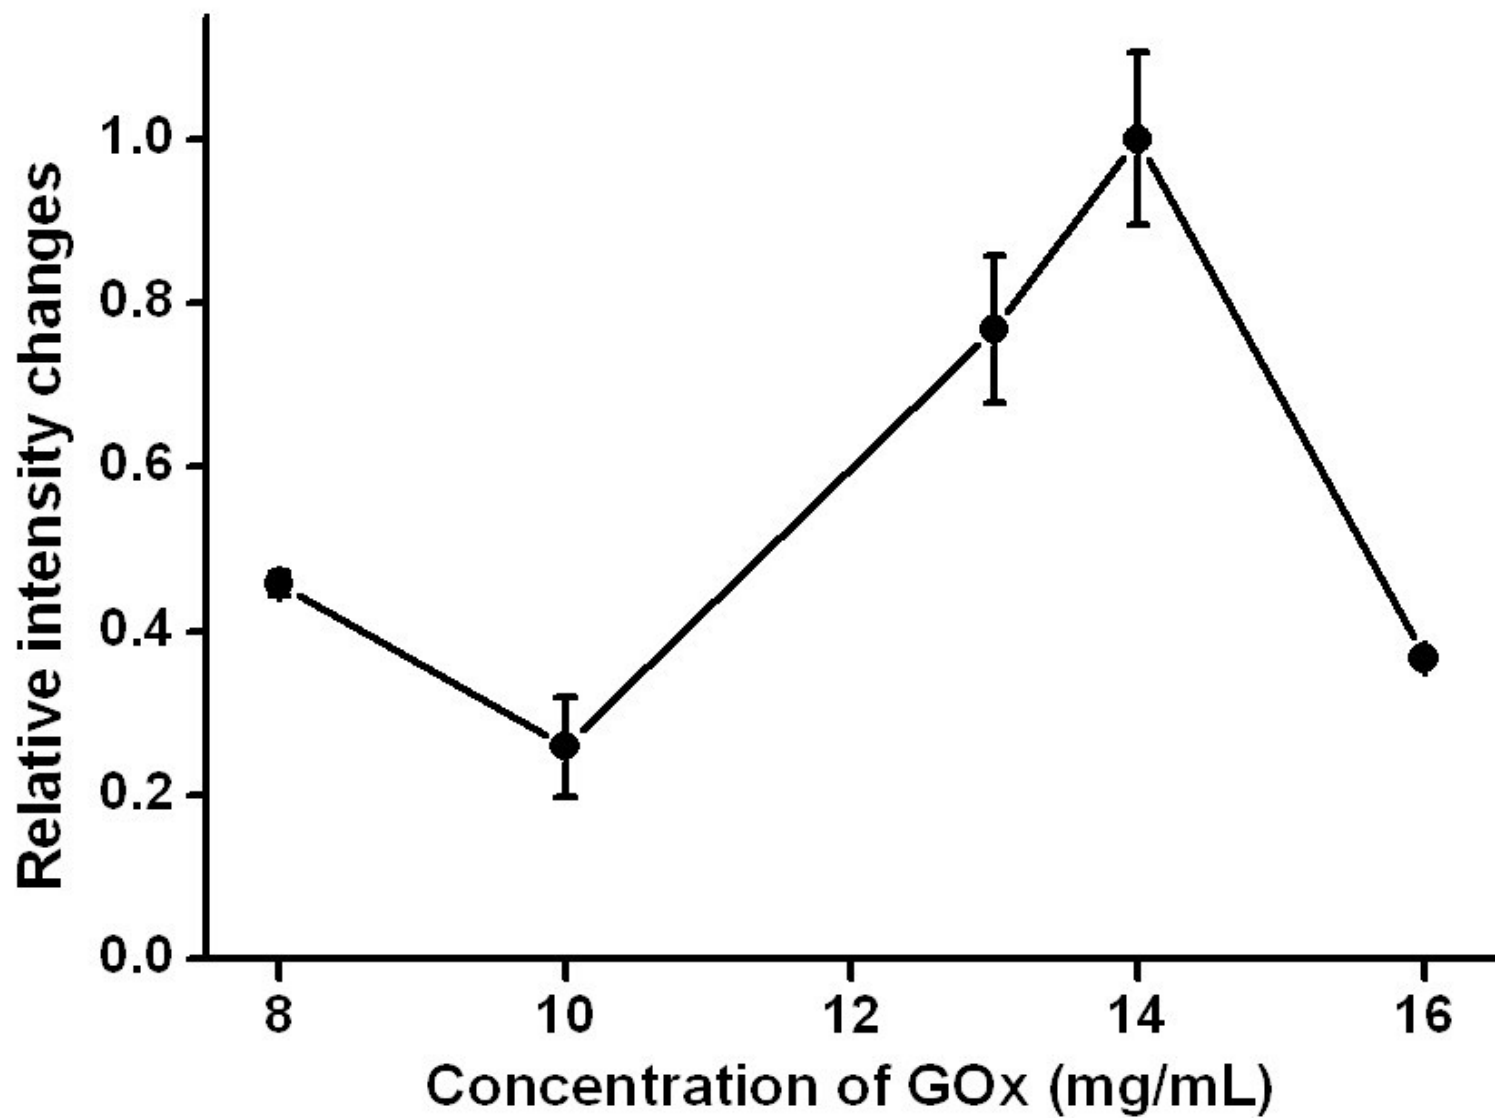

Supplement: c7dt00875a9.pdf [file c7dt00875a9.pdf]
